# Supplementary material for: Trapped copper in [6]cycloparaphenylene: a fully-exposed Cu7single cluster for highly active and selective CO electro-reduction
Source: Royal Society of Chemistry journal article supplement (doi:10.1039/d1ta06688a), 2021-01-01
Supplement: d1ta06688a1.pdf [file d1ta06688a1.pdf]

## ESI for

# Trapped Copper in [6]Cycloparaphenylene: a Fully-Exposed Cu<sub>7</sub> Single Cluster for Highly Active and Selective CO Electro-Reduction

Yi-Qing Liu, Zi-Yang Qiu, Xiang Zhao, Wei-Wei Wang, Jing-Shuang Dang

## Content

### Computational Methods

**Figure S1.** All optimized structures of Cu<sub>n</sub>@[6]CPP (n = 1-9) with the relative energies corresponding to the most stable isomer of each series.

**Figure S2.** AIMD simulations of Cu<sub>7</sub>@[6]CPP at room temperature.

**Figure S3.** Projected densities of states (PDOS) of the d orbital and the d-band center ( $\varepsilon_d$ ) of Cu<sub>hub</sub> and Cu<sub>rim</sub> of Cu<sub>7</sub>@[6]CPP and a Cu<sub>7</sub> fragment of Cu(111) surface. The Fermi level ( $E_F$ ) is set to zero.

**Figure S4.** Charge density difference of Cu<sub>7</sub>@[6]CPP. Yellow and cyan denote charge accumulation and depletion, respectively. The isosurface value is set to 0.008 e/Å<sup>3</sup>.

**Figure S5.** Electrostatic potential map of Cu<sub>7</sub>@[6]CPP.

**Figure S6.** Calculated total density of states of Cu<sub>7</sub>@[6]CPP. The Fermi level ( $E_F$ ) is set to zero.

**Figure S7.** Free energy diagrams of the HER and OH elimination processes on Cu(111) and Cu<sub>7</sub>@[6]CPP.

**Figure S8.** Projected densities of states (PDOS) of CO/\*CO and the reacting Cu sites of Cu<sub>7</sub>@[6]CPP and Cu(111). The Fermi level ( $E_F$ ) is set to zero.

**Figure S9.** Projected densities of states (PDOS) of OCH<sub>2</sub>/\*OCH<sub>2</sub> and the reacting Cu sites of Cu(111). The Fermi level ( $E_F$ ) is set to zero.

**Figure S10.** Schematic representations of the (a) H<sub>2</sub>O-solvated and (b) H-shuttling models.

**Figure S11.** The free energy diagram and relevant structures of the reaction \*CO + \*H → \*CHO along the H<sub>2</sub>O-solvated mechanism.

**Figure S12.** Structures and relative energies of separated and coupled CO-CO and CO-CHO intermediates.

**Table S1.** Calculated energy of optimized Cu<sub>n</sub>@[6]CPP structures (n=1-9). (a), (b) and (c) represent different structures with the same number of Cu atoms.

**Table S2.** Formation energy ( $E_f$ ) of the most stable structure of Cu<sub>n</sub>@[6]CPP (n=1-9)

**Table S3.** The electronic energy ( $EE$ ), free energy correction (CORR, including ZPE, entropy, and solvation corrections), and free energy ( $G$ ) of each relevant structure on the C<sub>1</sub> route of CO reduction catalyzed by Cu<sub>7</sub>@[6]CPP.

**Table S4.** The electronic energy ( $EE$ ), free energy correction (CORR, including ZPE, entropy, and solvation corrections), and free energy ( $G$ ) of each relevant structure on the C<sub>1</sub> route of CO reduction catalyzed by Cu(111).

**Table S5.** The electronic energy ( $EE$ ), free energy correction (CORR, including ZPE, entropy, and solvation corrections), and free energy ( $G$ ) of implicit H<sub>2</sub>O solvation corrected \*CO and \*CHO on the C<sub>1</sub> route of CO reduction catalyzed by Cu<sub>7</sub>@[6]CPP.



## Computational Methods

The periodic density functional theory (DFT) calculations were performed by using the Vienna ab initio simulation program (VASP.5.4.4)<sup>[1-3]</sup> along with the spin-polarized Perdew-Burke-Ernzerhof (PBE)<sup>[4]</sup> functional.

The Cu(111) slab model was composed of a  $5 \times 5 \times 5$  unit cell ( $a = b = 10.2754 \text{ \AA}$ ,  $c = 20.4873 \text{ \AA}$ ,  $\alpha = \beta = 90^\circ$ ,  $\gamma = 120^\circ$ ) with a vacuum set to  $12.23 \text{ \AA}$  in the z-direction. The bottom three layers of the slab were fixed during geometry optimization. Calculations on the Cu<sub>7</sub>@[6]CPP were also represented by a periodic model constructed using bulk cell dimensions:  $a = b = c = 20.60 \text{ \AA}$ ,  $\alpha = \beta = \gamma = 90^\circ$ . The repeated units were separated from their neighboring molecules by a  $16.34 \text{ \AA}$  vacuum in the c-direction.

A plane-wave cut off energy of 500 eV was used and the convergence tolerances for the force were set as  $0.02 \text{ eV/\AA}$  and  $10^{-5} \text{ eV}$  for the energy, respectively. The  $3 \times 3 \times 1$  and  $1 \times 1 \times 1$  Monkhorst–Pack k-point meshes were adopted to sample the surface Brillouin zone of Cu(111) and Cu<sub>7</sub>@[6]CPP-involving structures, respectively.<sup>[5]</sup> In the cases of Cu(111)-involving structures, the bottom three layers of the slab were fixed in optimization and all the five Cu layers were fixed in frequency calculations. As for the Cu<sub>7</sub>@[6]CPP-involving structures, all the atoms were allowed to relax during optimization and frequency calculations. Kinetically, the climbing image nudged elastic band method (CI-NEB) approach was used to locate transition states with 7 images and frequency analyses were carried out to confirm the nature of saddle points.

The computational hydrogen electrode (CHE) model was used to calculate Gibbs free energy change ( $\Delta G$ ) for each elemental step, as pioneered by Nørskov and co-workers.<sup>[6-7]</sup>  $\Delta G$  was calculated as

$$\Delta G = \Delta E + \Delta E_{ZPE} - T\Delta S + eU + \Delta G_{pH}$$

where  $\Delta E$  is the reaction energy,  $\Delta E_{ZPE}$  and  $\Delta S$  are zero-point energy and entropy change at  $T = 298.15 \text{ K}$ , respectively.  $\Delta G_{pH}$  is the free energy correction of pH, which is obtained by  $\Delta G_{pH} = k_B T \times \ln 10 \times \text{pH}$ , and  $\text{pH} = 0$  was assumed in the present study.  $e$  and  $U$  refer to the number of electrons transferred and the applied electrode potential, respectively. Moreover, the free energy of the proton-electron pair was used as one-half of the chemical potential of the hydrogen molecule.

In addition, we also employed an approximate solvation correction proposed by Nørskov and co-workers to account for the effect of water.<sup>[7-8]</sup> The Gibbs free energies of \*OH, \*CO, \*CHO, and \*R-OH intermediates are stabilized by 0.5, 0.1, 0.1, and 0.25 eV, respectively. Moreover, for the limiting potential step (\*CO → \*CHO) of the CRR process, we introduced an implicit solvent model for the optimizations of \*CO and \*CHO, in which the code of VASPsol<sup>[9]</sup> was used with a dielectric constant of 78.54 to simulate the H<sub>2</sub>O solvent environment. We found the calculated  $\Delta G_{\text{CO-CHO}}$  by employing those two approaches are almost same (0.40 eV and 0.39 eV), and accordingly, to reduce computational cost, the empirical solvation correction was used to calculate the free energy changes.

- [1] G. Kresse, J. Furthmüller, *Phys. Rev. B* **1996**, *54*, 11169-11186.
- [2] G. Kresse, J. Hafner, *Phys. Rev. B* **1993**, *47*, 558-561.
- [3] G. Kresse, J. Hafner, *Phys. Rev. B* **1994**, *49*, 14251-14269.
- [4] J. P. Perdew, K. Burke, M. Ernzerhof, *Phys. Rev. Lett.* **1996**, *77*, 3865-3868.
- [5] H. J. Monkhorst, J. D. Pack, *Phys. Rev. B* **1976**, *13*, 5188-5192.
- [6] J. K. Nørskov, J. Rossmeisl, A. Logadottir, L. Lindqvist, J. R. Kitchin, T. Bligaard, H. Jónsson, *J.*

*Phys. Chem. B* **2004**, *108*, 17886-17892.

- [7] A. A. Peterson, F. Abild-Pedersen, F. Studt, J. Rossmeisl, J. K. Nørskov, *Energy Environ. Sci.* **2010**, *3*, 1311-1315.
- [8] W. J. Durand, A. A. Peterson, F. Studt, F. Abild-Pedersen, J. K. Nørskov, *Surf. Sci.* **2011**, *605*, 1354-1359.
- [9] K. Mathew, R. Sundararaman, K. Letchworth-Weaver, T. A. Arias, R. G. Hennig, *J. Chem. Phys.* **2014**, *140*, 084106.

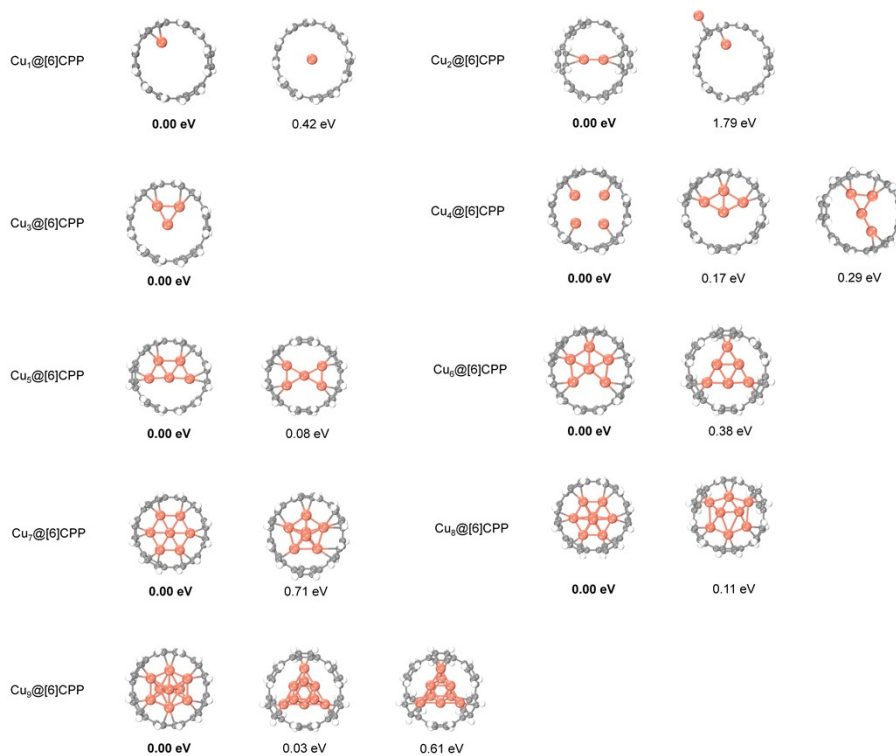

**Figure S1.** All optimized structures of  $\text{Cu}_n@[6]\text{CPP}$  ( $n = 1-9$ ) with the relative energies corresponding to the most stable isomer of each series.

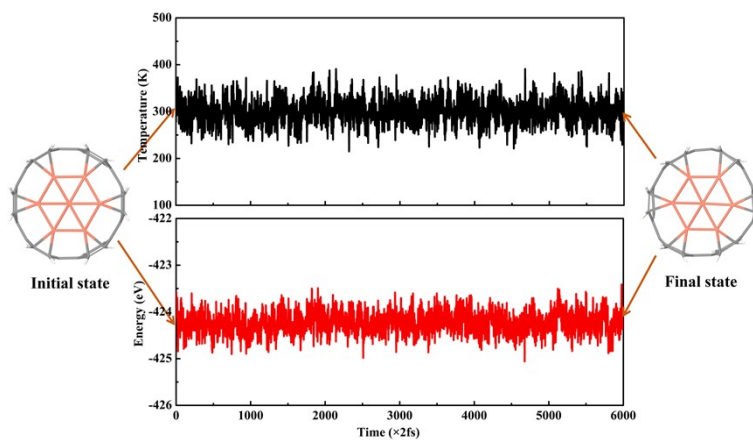

**Figure S2.** AIMD simulations of  $\text{Cu}_7@[6]\text{CPP}$  at room temperature.

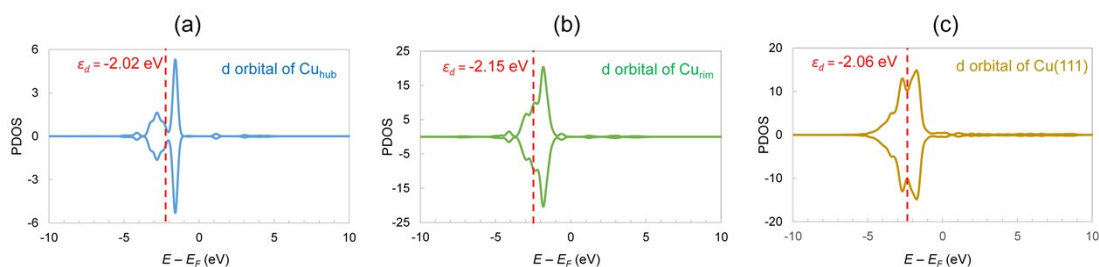

**Figure S3.** Projected densities of states (PDOS) of the d orbital and the d-band center ( $\epsilon_d$ ) of  $\text{Cu}_{\text{hub}}$  and  $\text{Cu}_{\text{rim}}$  of  $\text{Cu}_7@[6]\text{CPP}$  and a  $\text{Cu}_7$  fragment of  $\text{Cu}(111)$  surface. The Fermi level ( $E_F$ ) is set to zero.

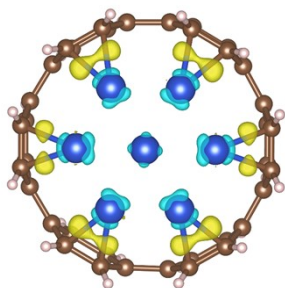

**Figure S4.** Charge density difference of  $\text{Cu}_7@[6]\text{CPP}$ . Yellow and cyan denote charge accumulation and depletion, respectively. The isosurface value is set to  $0.008 \text{ e}/\text{\AA}^3$ .

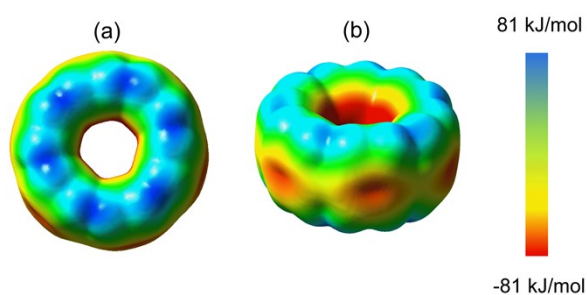

**Figure S5.** Electrostatic potential map of  $\text{Cu}_7@[6]\text{CPP}$ .

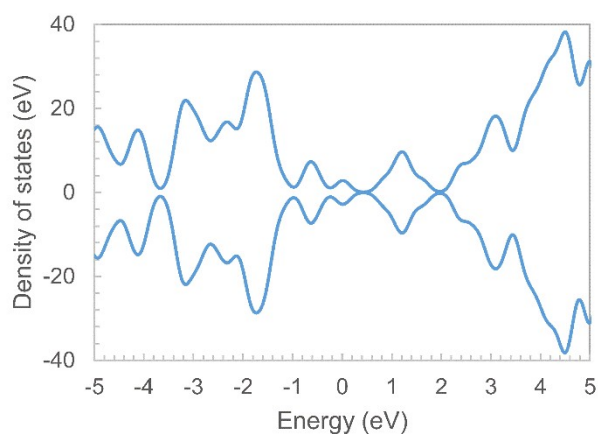

**Figure S6.** Calculated total density of states of  $\text{Cu}_7@[6]\text{CPP}$ . The Fermi level ( $E_F$ ) is set to zero.

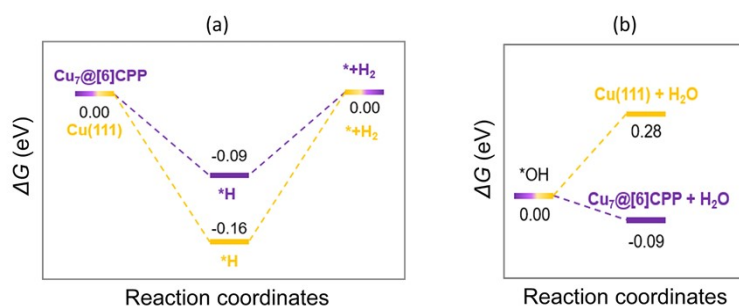

**Figure S7.** Free energy diagrams of the HER and OH elimination processes on  $\text{Cu}(111)$  and  $\text{Cu}_7@[6]\text{CPP}$ .

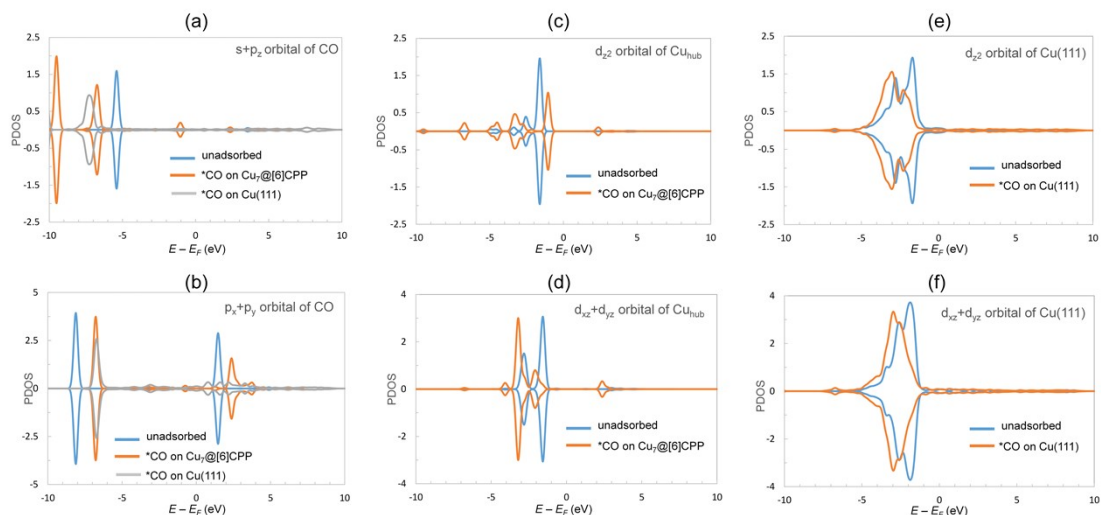

**Figure S8.** Projected densities of states (PDOS) of CO/\*CO and the reacting Cu sites of Cu<sub>7</sub>@[6]CPP and Cu(111). The Fermi level ( $E_F$ ) is set to zero.

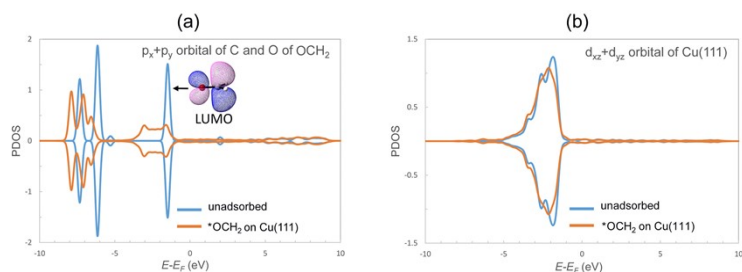

**Figure S9.** Projected densities of states (PDOS) of OCH<sub>2</sub>/\*OCH<sub>2</sub> and the reacting Cu sites of Cu(111). The Fermi level ( $E_F$ ) is set to zero.

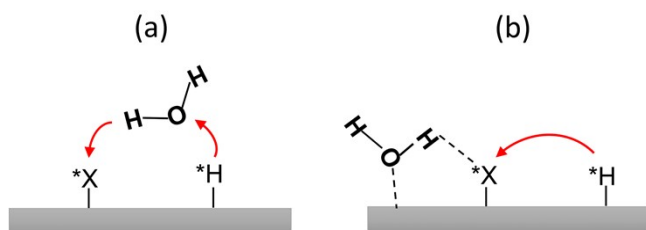

**Figure S10.** Schematic representations of the (a)H<sub>2</sub>O-solvated and (b) H-shuttling models.

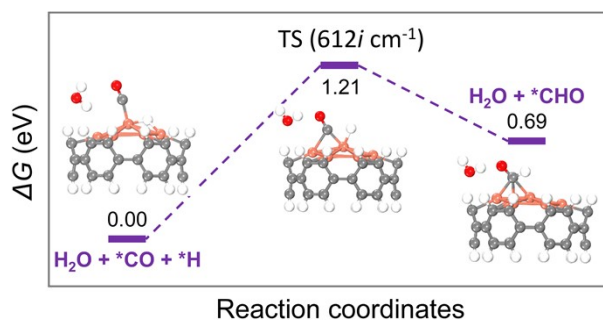

**Figure S11.** The free energy diagram and relevant structures of the reaction  $*CO + *H \rightarrow *CHO$  along the H<sub>2</sub>O-solvated mechanism.

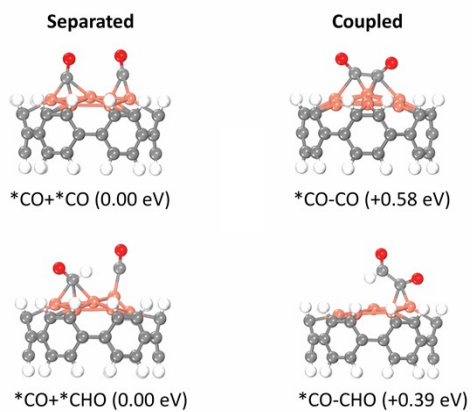

**Figure S12.** Structures and relative energies of separated and coupled CO-CO and CO-CHO intermediates



**Table S1.** Calculated energy of optimized  $\text{Cu}_n@[6]\text{CPP}$  structures ( $n=1-9$ ). (a), (b) and (c) represent different structures with the same number of Cu atoms

| Structure                   | $E_{(a)}$ (eV) | $E_{(b)}$ (eV) | $E_{(c)}$ (eV) |
|-----------------------------|----------------|----------------|----------------|
| $\text{Cu}_1@[6]\text{CPP}$ | -409.78        | -409.36        |                |
| $\text{Cu}_2@[6]\text{CPP}$ | -412.82        | -411.03        |                |
| $\text{Cu}_3@[6]\text{CPP}$ | -415.19        |                |                |
| $\text{Cu}_4@[6]\text{CPP}$ | -417.61        | -417.45        | -417.32        |
| $\text{Cu}_5@[6]\text{CPP}$ | -420.55        | -420.47        |                |
| $\text{Cu}_6@[6]\text{CPP}$ | -423.32        | -422.94        |                |
| $\text{Cu}_7@[6]\text{CPP}$ | -426.93        | -426.21        |                |
| $\text{Cu}_8@[6]\text{CPP}$ | -429.46        | -429.36        |                |
| $\text{Cu}_9@[6]\text{CPP}$ | -432.19        | -432.16        | -431.58        |

**Table S2.** Formation energy ( $E_f$ ) of the most stable structure of  $\text{Cu}_n@[6]\text{CPP}$  ( $n=1-9$ )

| n | $\text{Cu}_{n-1}@[6]\text{CPP}$ (eV) | $\text{Cu}_n@[6]\text{CPP}$ (eV) | Cu (eV) | $E_f$ (eV) |
|---|--------------------------------------|----------------------------------|---------|------------|
| 1 | -409.00                              | -409.78                          | -0.24   | -0.53      |
| 2 | -409.78                              | -412.82                          | -0.24   | -2.80      |
| 3 | -412.82                              | -415.19                          | -0.24   | -2.13      |
| 4 | -415.19                              | -417.61                          | -0.24   | -2.18      |
| 5 | -417.61                              | -420.55                          | -0.24   | -2.70      |
| 6 | -420.55                              | -423.32                          | -0.24   | -2.52      |
| 7 | -423.32                              | -426.93                          | -0.24   | -3.37      |
| 8 | -426.93                              | -429.46                          | -0.24   | -2.29      |
| 9 | -429.46                              | -432.19                          | -0.24   | -2.49      |

**Table S3.** The electronic energy ( $EE$ ), free energy correction (CORR, including ZPE, entropy, and solvation corrections), and free energy ( $G$ ) of each relevant structure on the  $\text{C}_1$  route of CO reduction catalyzed by  $\text{Cu}_7@[6]\text{CPP}$

| Structure                                 | $EE$ (eV) | $CORR$ (eV) | $G$ (eV) |
|-------------------------------------------|-----------|-------------|----------|
| $\text{Cu}_7@[6]\text{CPP}$               | -426.90   | 11.92       | -415.00  |
| *CO                                       | -442.51   | 11.96       | -430.55  |
| *CHO                                      | -445.80   | 12.24       | -433.56  |
| $\text{Cu}_7@[6]\text{CPP} + \text{HCHO}$ | -449.24   | 12.63       | -436.61  |
| CO                                        | -14.78    | -0.39       | -15.17   |
| $\text{H}_2$                              | -6.77     | -0.04       | -6.81    |
| HCHO                                      | -22.13    | 0.13        | -22.00   |
| $\text{CO}_2$                             | -22.95    | -0.26       | -23.21   |
| $\text{H}_2\text{O}$                      | -14.22    | 0.09        | -14.13   |

**Table S4.** The electronic energy ( $EE$ ), free energy correction ( $CORR$ , including ZPE, entropy, and solvation corrections), and free energy ( $G$ ) of each relevant structure on the  $C_1$  route of CO reduction catalyzed by Cu(111)

| Structure         | $EE$ (eV) | $CORR$ (eV) | $G$ (eV) |
|-------------------|-----------|-------------|----------|
| Cu(111)           | -283.09   | 0.00        | -283.09  |
| *CO               | -298.82   | 0.01        | -298.81  |
| *CHO              | -301.55   | 0.29        | -301.25  |
| *OCH <sub>2</sub> | -305.25   | 0.50        | -304.75  |
| *OCH <sub>3</sub> | -309.88   | 0.91        | -308.97  |
| *O                | -289.68   | 0.06        | -289.62  |
| *OH               | -293.91   | -0.18       | -294.09  |
| CO                | -14.78    | -0.39       | -15.16   |
| H <sub>2</sub>    | -6.77     | -0.04       | -6.81    |
| CH <sub>4</sub>   | -24.04    | 0.71        | -23.32   |
| H <sub>2</sub> O  | -14.21    | 0.09        | -14.13   |
| CO <sub>2</sub>   | -22.96    | -0.26       | -23.21   |

**Table S5.** The electronic energy ( $EE$ ), free energy correction ( $CORR$ , including ZPE, entropy, and solvation corrections), and free energy ( $G$ ) of implicit H<sub>2</sub>O solvation corrected \*CO and \*CHO on the  $C_1$  route of CO reduction catalyzed by Cu<sub>7</sub>@[6]CPP

| Structure | $EE$ (eV) | $CORR$ (eV) | $G$ (eV) |
|-----------|-----------|-------------|----------|
| *CO       | -443.00   | 12.06       | -430.94  |
| *CHO      | -446.29   | 12.35       | -433.95  |
